# Supplementary material for: Dinuclear Cu(ii) complexes based on two flexible Schiff-base ligands and one unusual in situ formed diphenolate 2,6-piperidin-4-one derivative
Source: Royal Society of Chemistry journal article supplement (doi:10.1039/c4dt01014k), 2014-01-01
Supplement: c4dt01014k1.pdf [file c4dt01014k1.pdf]

## Dinuclear copper(II) complexes based on two multidentate flexible Schiff-base ligands and one unusual *in situ* formed diphenolate 2,6-piperidin-4-one derivative

Yuan Dai,<sup>a</sup> Yin-Ge Wang,<sup>b</sup> Jiao Geng,<sup>a</sup> Yu-Xin Peng<sup>a</sup> and Wei Huang,<sup>a,\*</sup>

<sup>a</sup> State Key Laboratory of Coordination Chemistry, Nanjing National Laboratory of Microstructures, School of Chemistry and Chemical Engineering, Nanjing University, Nanjing 210093, P. R. China

<sup>b</sup> College of Sciences, Nanjing Tech University, Nanjing, 210009, P. R. China

### Electronic Supporting Information

#### Syntheses of Schiff-base ligands HL<sub>1</sub> and HL<sub>2</sub>.

**HL<sub>1</sub>**: *N*-(3-Aminopropyl)imidazole (2.05 g, 16.4 mmol) was added into an ethanol solution (20 cm<sup>3</sup>) of 3,5-dichlorosalicylaldehyde (3.13 g, 16.4 mmol), and three drops of glacial acetic acid were added. The mixture was refluxed for 5 h and cooled to room temperature. The solvent was removed by a rotatory evaporator and the yellow solid HL<sub>1</sub> was obtained in a yield of 3.81 g (78 %). M.P: 90–92 °C. *Anal.* Calc. for C<sub>13</sub>H<sub>13</sub>Cl<sub>2</sub>N<sub>3</sub>O: C, 52.37; H, 4.39; N, 14.09 %. Found: C, 52.25; H, 4.12; N, 13.95 %. Main FT–IR absorptions (KBr pellets, cm<sup>-1</sup>): 3438 (w), 1637 (vs), 1508 (m), 1450 (s), 1222 (m), 748 (m). <sup>1</sup>H NMR (300 MHz, CD<sub>3</sub>OD)  $\delta$  = 8.40 (s, 1H, H<sub>c</sub>), 7.72 (s, 1H, H<sub>g</sub>), 7.45 (d,  $J$  = 1.8 Hz, 1H, H<sub>h</sub>), 7.28 (d,  $J$  = 1.8 Hz, 1H, H<sub>i</sub>), 7.19 (s, 1H, H<sub>a</sub>), 6.98 (s, 1H, H<sub>b</sub>), 4.17 (t,  $J$  = 6.9 Hz, 2H, H<sub>f</sub>), 3.66 (t,  $J$  = 6.8 Hz, 2H, H<sub>d</sub>), 2.20–2.29 (tt,  $J$  = 6.6 and 6.9 Hz, 2H, H<sub>e</sub>). <sup>13</sup>C NMR (75 MHz, CDCl<sub>3</sub>):  $\delta$  = 163.8, 156.3, 131.1, 128.3, 121.6, 121.0, 118.6, 53.7, 43.4, 30.5 ppm. UV–Vis in methanol,  $\lambda_{\text{max}}$  = 372 and 295 nm. ESI–TOF–MS (negative):  $m/z$  = 296.25 (100 %), [M–H]<sup>-</sup>.

**HL<sub>2</sub>**: Synthesis of HL<sub>2</sub> was similar to that of HL<sub>1</sub> except that 3,5-dibromosalicylaldehyde (6.35 g, 16.4 mmol) was used. Yield: 5.33 g (84 %). M.P: 105–107 °C *Anal.* Calc. for C<sub>13</sub>H<sub>13</sub>Br<sub>2</sub>N<sub>3</sub>O: C, 40.34; H, 3.39; N, 10.86 %. Found: C, 40.18; H, 3.56; N, 10.77 %. Main FT–IR absorptions (KBr pellets, cm<sup>-1</sup>): 3415 (w), 3051(w), 1638 (vs), 1501 (s), 1448 (s), 1228 (m), 865 (m). <sup>1</sup>H NMR (300 MHz, CD<sub>3</sub>OD)  $\delta$  = 8.38 (s, 1H, H<sub>c</sub>), 7.74 (d, *J* = 2.4 Hz, 1H, H<sub>h</sub>), 7.69 (s, 1H, H<sub>g</sub>), 7.48 (d, *J* = 2.4 Hz, 1H, H<sub>i</sub>), 7.18 (s, 1H, H<sub>a</sub>), 6.97 (s, 1H, H<sub>b</sub>), 4.17 (t, *J* = 7.1 Hz, 2H, H<sub>f</sub>), 3.66 (t, *J* = 6.8 Hz, 2H, H<sub>d</sub>), 2.20–2.29 (tt, *J* = 6.9 and 6.9 Hz, 2H, H<sub>e</sub>). <sup>13</sup>C NMR (75 MHz, CD<sub>3</sub>OD):  $\delta$  = 166.6, 163.4, 139.6, 135.0, 119.9, 115.3, 108.1, 53.9, 45.5, 32.5 ppm. UV–Vis in methanol,  $\lambda_{\text{max}}$  = 375 and 291 nm. ESI–TOF–MS (negative): *m/z* = 385.83 (100 %), [M–H]<sup>-</sup>.

**Table SII** Selected bond angles (°) for **1**, **2** and **3**.

|            |           |            |           |
|------------|-----------|------------|-----------|
| <b>1</b>   |           |            |           |
| O2–Cu1–O1  | 161.5(1), | O2–Cu1–N1  | 88.6(1)   |
| O1–Cu1–N1  | 90.8(1),  | O2–Cu1–N4  | 90.7(1)   |
| O1–Cu1–N4  | 88.8(1)   | N1–Cu1–N4  | 176.6(1)  |
| O2–Cu1–N3A | 96.6(1)   | O1–Cu1–N3A | 101.8(1), |
| N1–Cu1–N3A | 94.4(1),  | N4–Cu1–N3A | 89.2(1)   |
| <b>2</b>   |           |            |           |
| O1–Cu1–O2  | 162.0(5)  | O1–Cu1–N4  | 87.4(6),  |
| O2–Cu1–N4  | 90.5(5),  | O1–Cu1–N1  | 92.0(6),  |
| O2–Cu1–N1  | 89.0(5),  | N4–Cu1–N1  | 176.2(6)  |
| O1–Cu1–N3A | 100.9(6)  | O2–Cu1–N3A | 97.0(5)   |
| N4–Cu1–N3A | 88.9(6)   | N1–Cu1–N3A | 94.9(6)   |
| <b>3</b>   |           |            |           |
| O1–Cu1–O3  | 171.4(2)  | O1–Cu1–N1  | 86.9(2)   |
| O3–Cu1–N1  | 88.2(2),  | O1–Cu1–N3  | 92.4(2)   |
| O3–Cu1–N3  | 93.8(2)   | N1–Cu1–N3  | 168.6(2)  |

**Table SI2.** Hydrogen bonding parameters (Å, °) in complex **3**.

| D–H···A       | <i>d</i> (D–H) | <i>d</i> (H···A) | <i>d</i> (D···A) | $\angle$ DHA | Sym. Code     |
|---------------|----------------|------------------|------------------|--------------|---------------|
| <b>3</b>      |                |                  |                  |              |               |
| O7–H7B···O3   | 0.85           | 2.30             | 2.890(1)         | 127          | 1-x, 1-y, 2-z |
| C15–H15···Cl2 | 0.93           | 2.66             | 3.547(6)         | 160          |               |
| C21–H21A···O1 | 0.97           | 2.60             | 3.190(7)         | 119          |               |

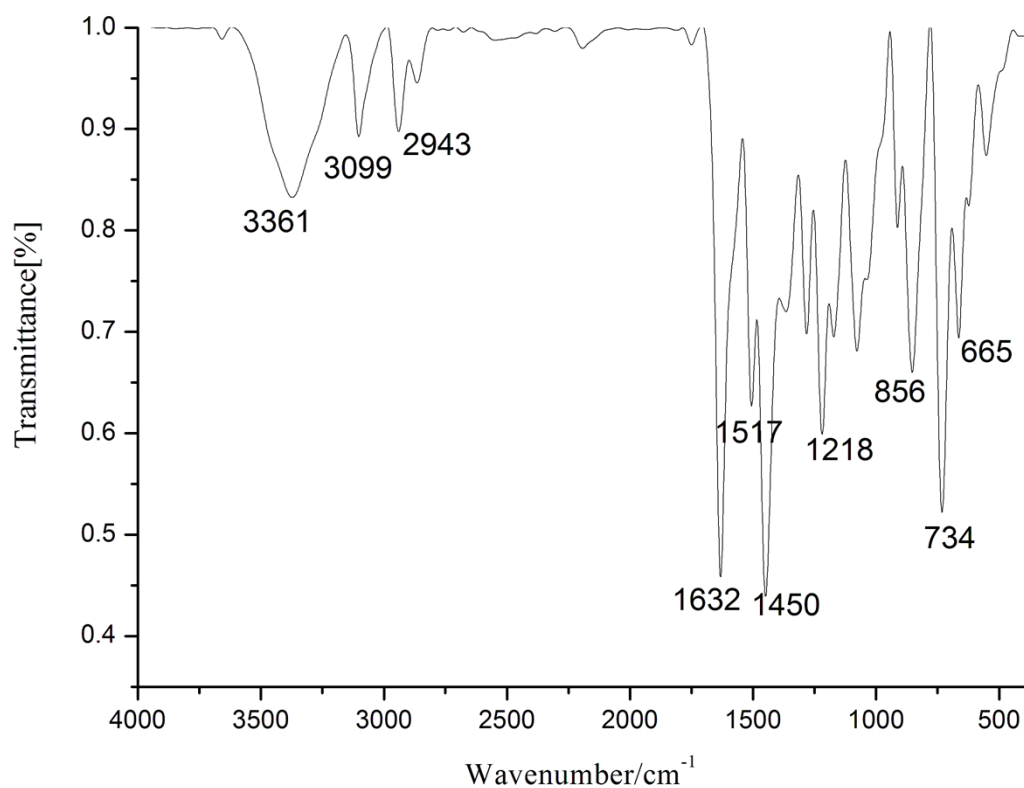

**Fig. SI1** FT-IR spectrum of ligand HL<sub>1</sub>.

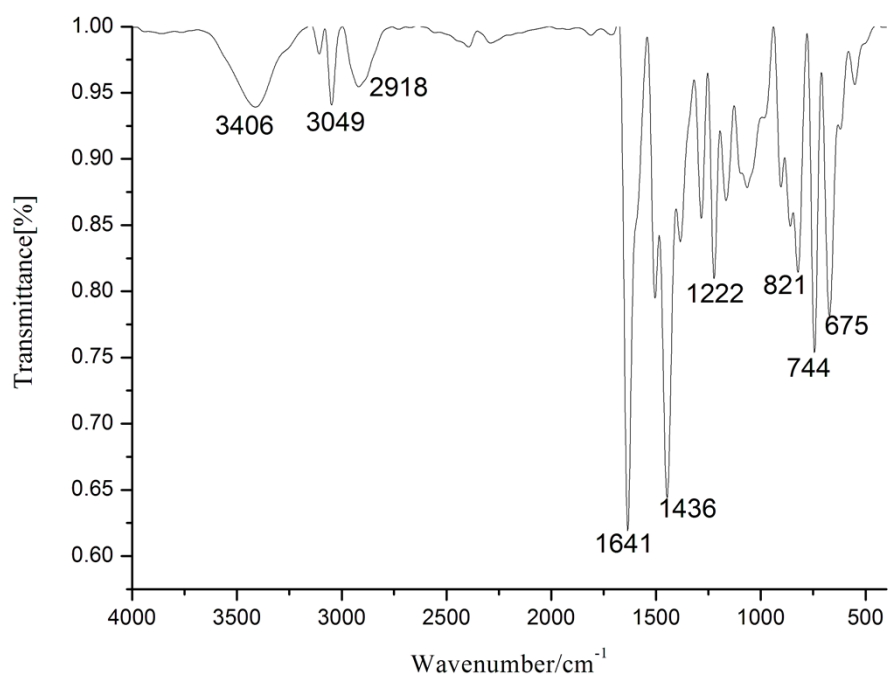

**Fig. SI2** FT-IR spectrum of ligand HL<sub>2</sub>.

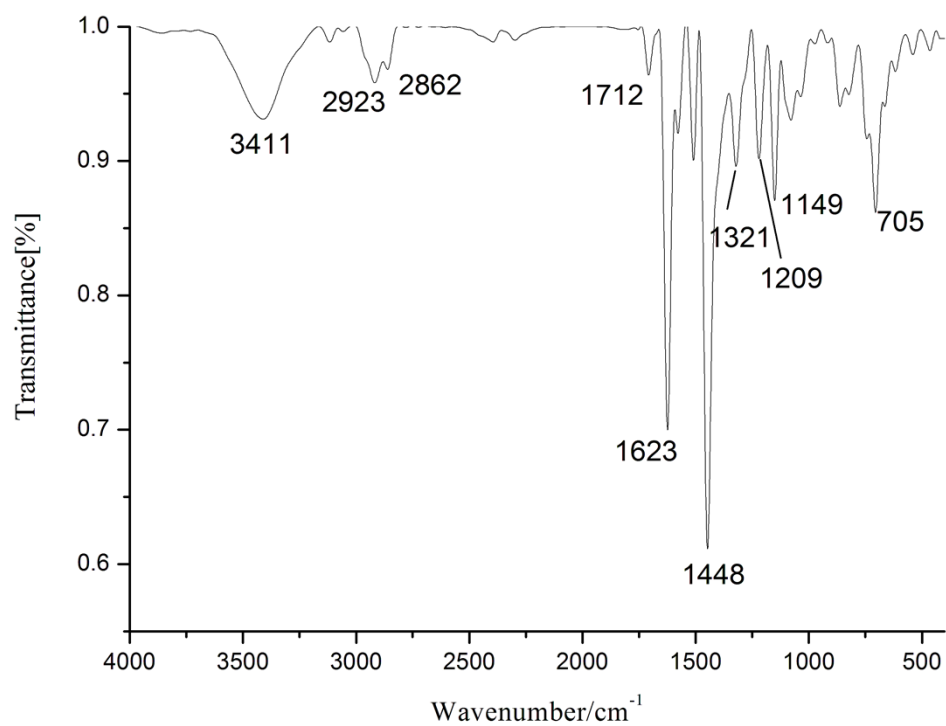

**Fig. SI3** FT-IR spectrum of complex 1.

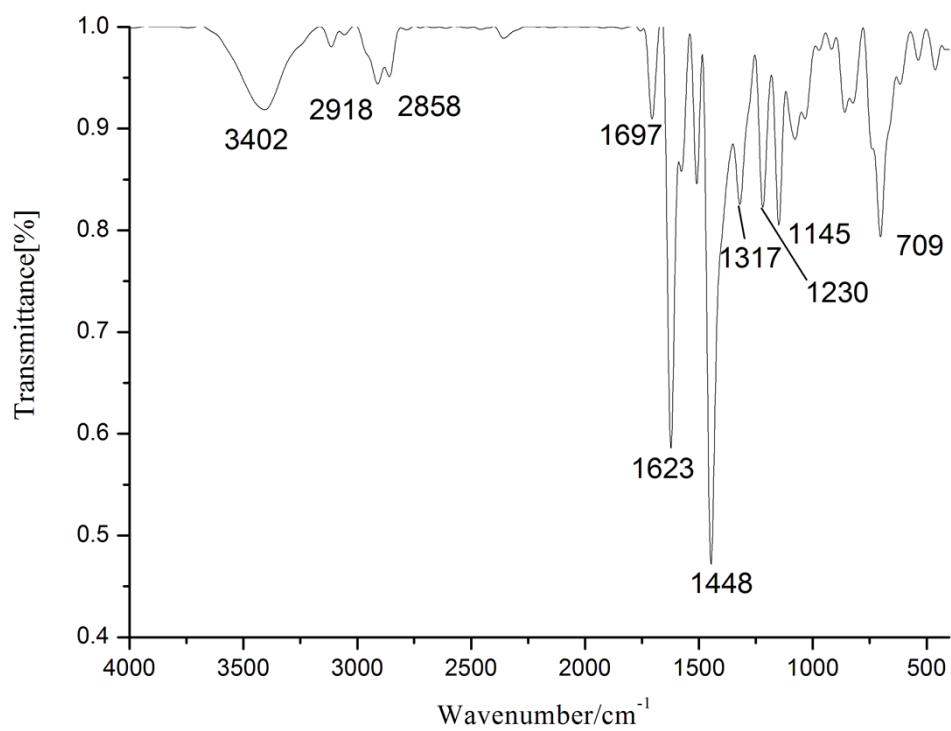

**Fig. SI4** FT-IR spectrum of complex 2.

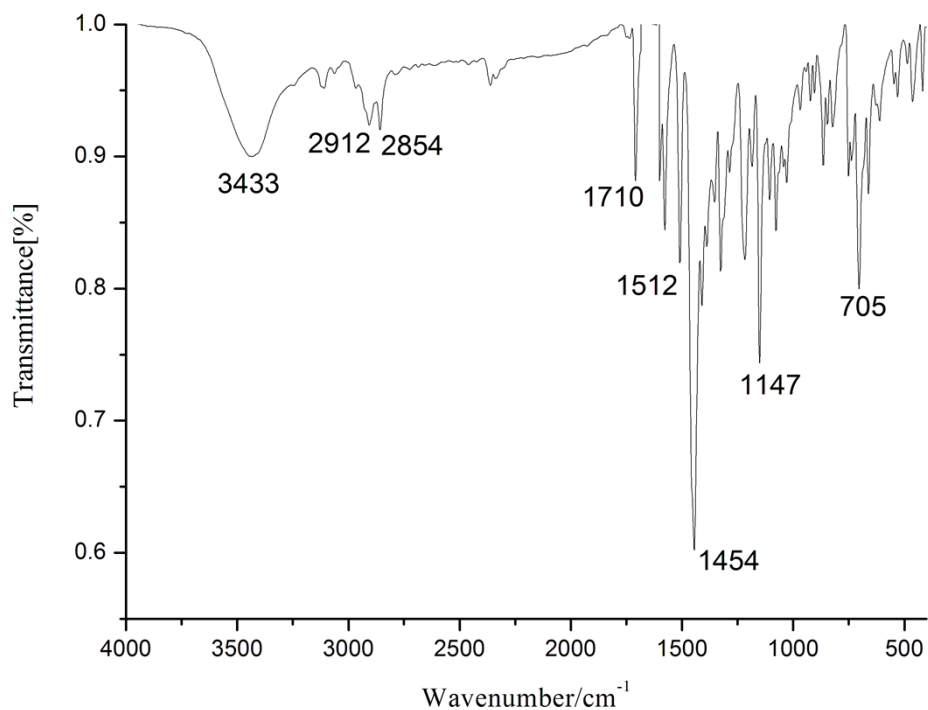

**Fig. SI5** FT-IR spectrum of complex 3.

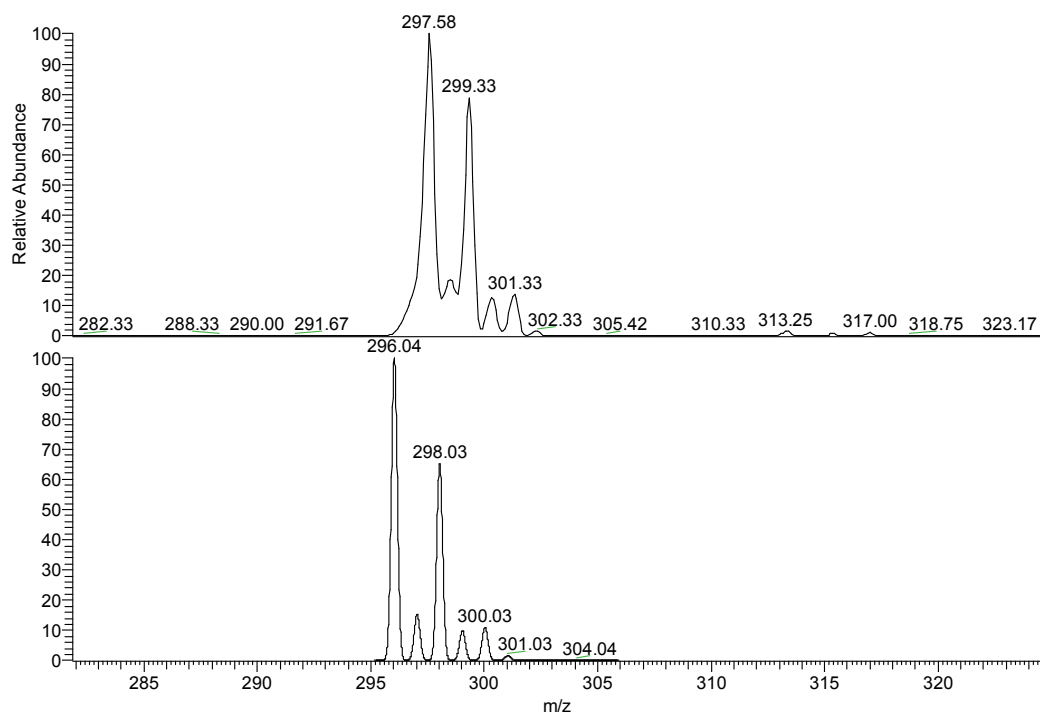

**Fig. SI6** Negative ESI-MS (top) and simulated one with isotope distribution (bottom) for ligand HL<sub>1</sub>.

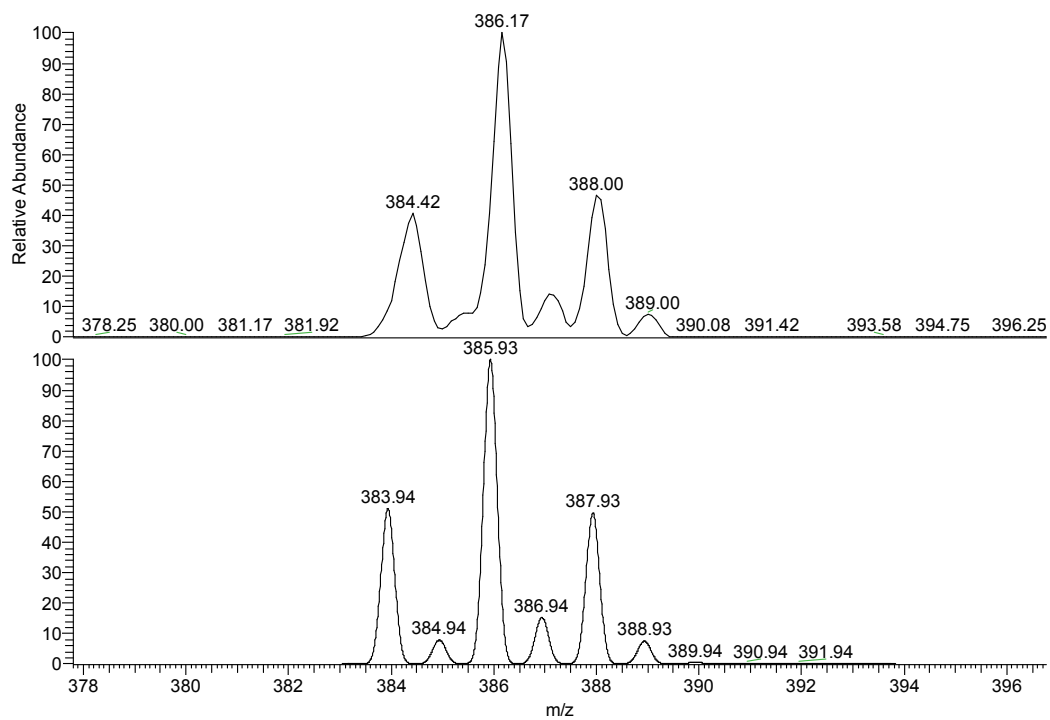

**Fig. S17** Negative ESI-MS (top) and simulated one with isotope distribution (bottom) for ligand HL<sub>2</sub>.

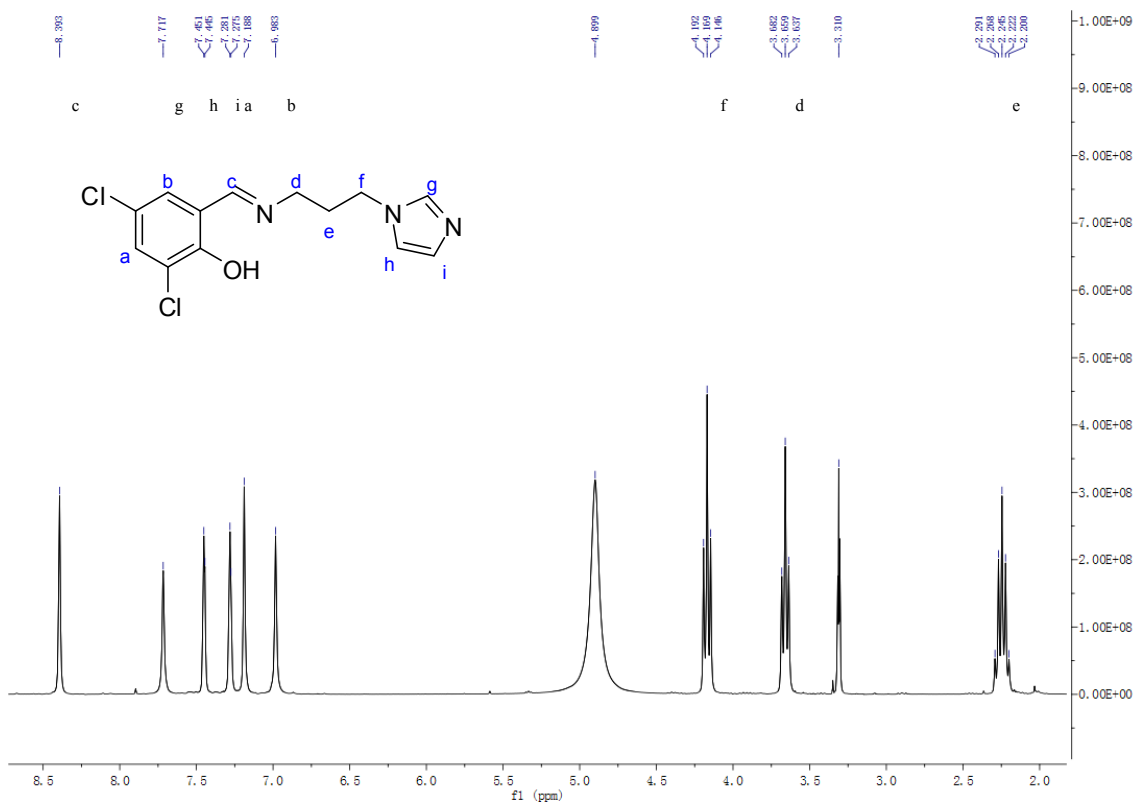

**Fig. S18** <sup>1</sup>H NMR spectrum of HL<sub>1</sub>.

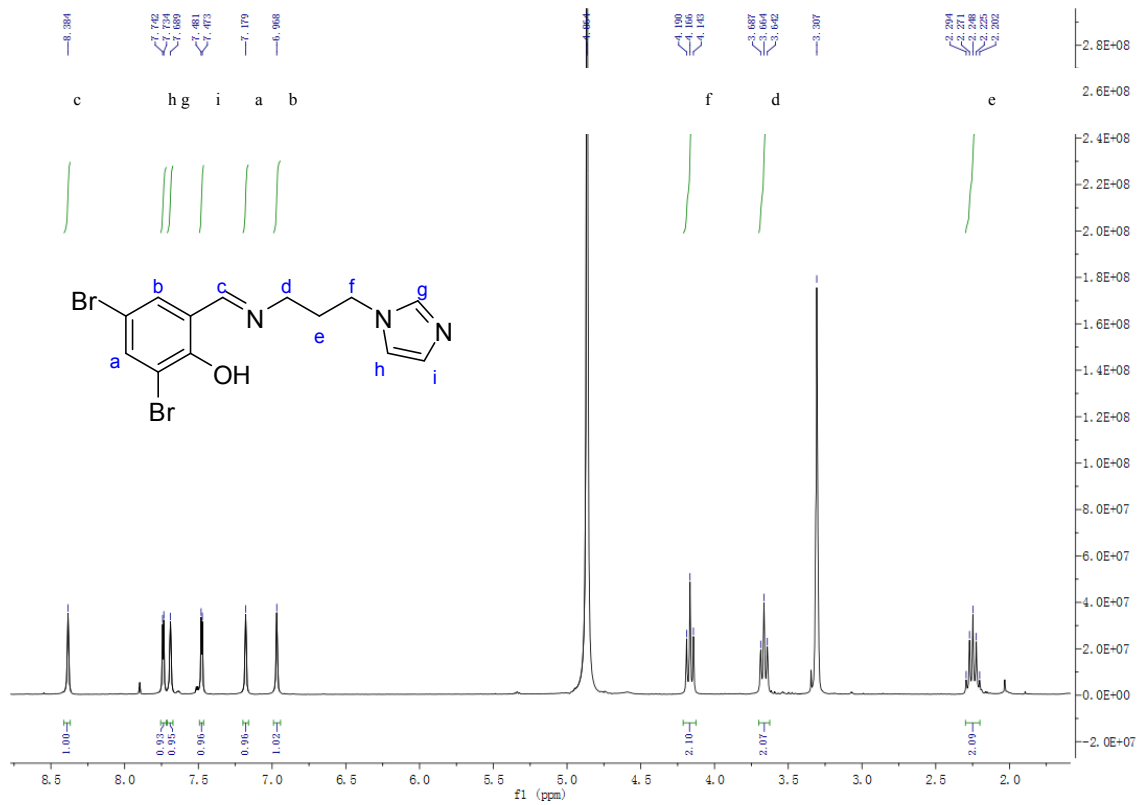

**Fig. SI9**  $^1\text{H}$  NMR spectrum of  $\text{HL}_2$ .

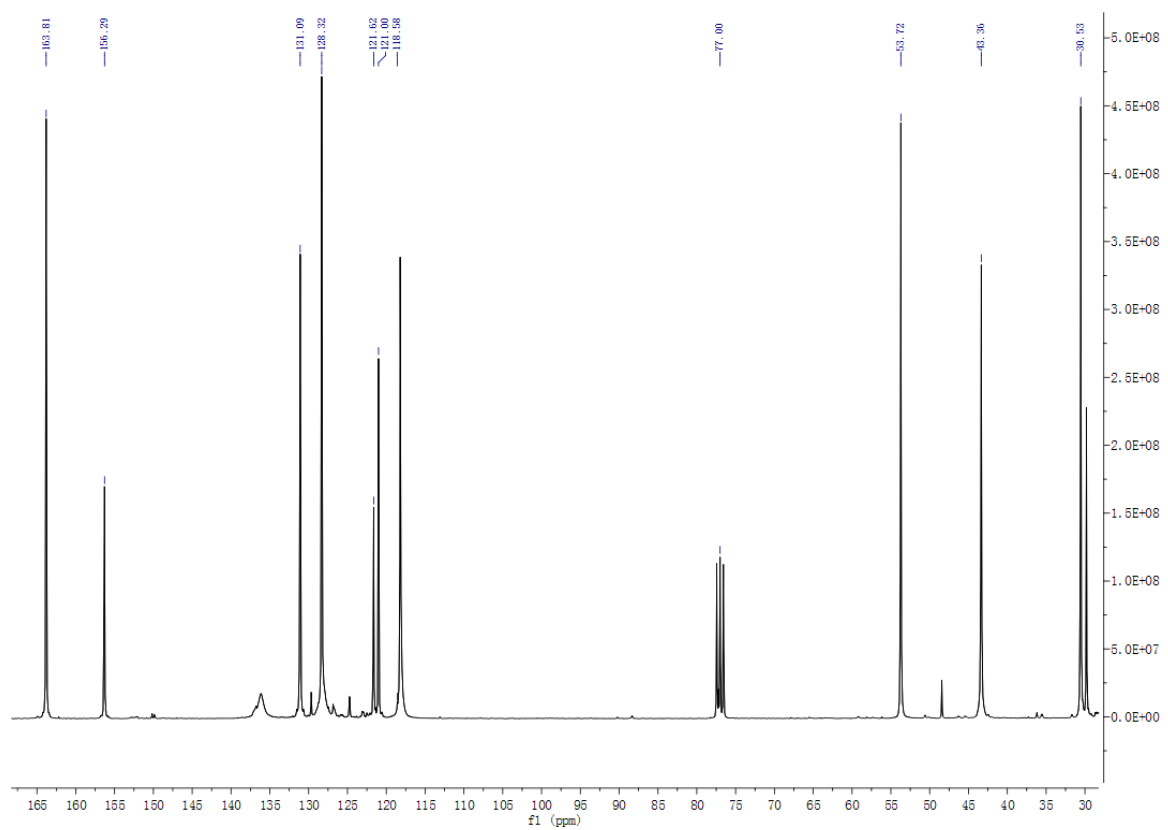

**Fig. SI10**  $^{13}\text{C}$  NMR spectrum of  $\text{HL}_1$ .

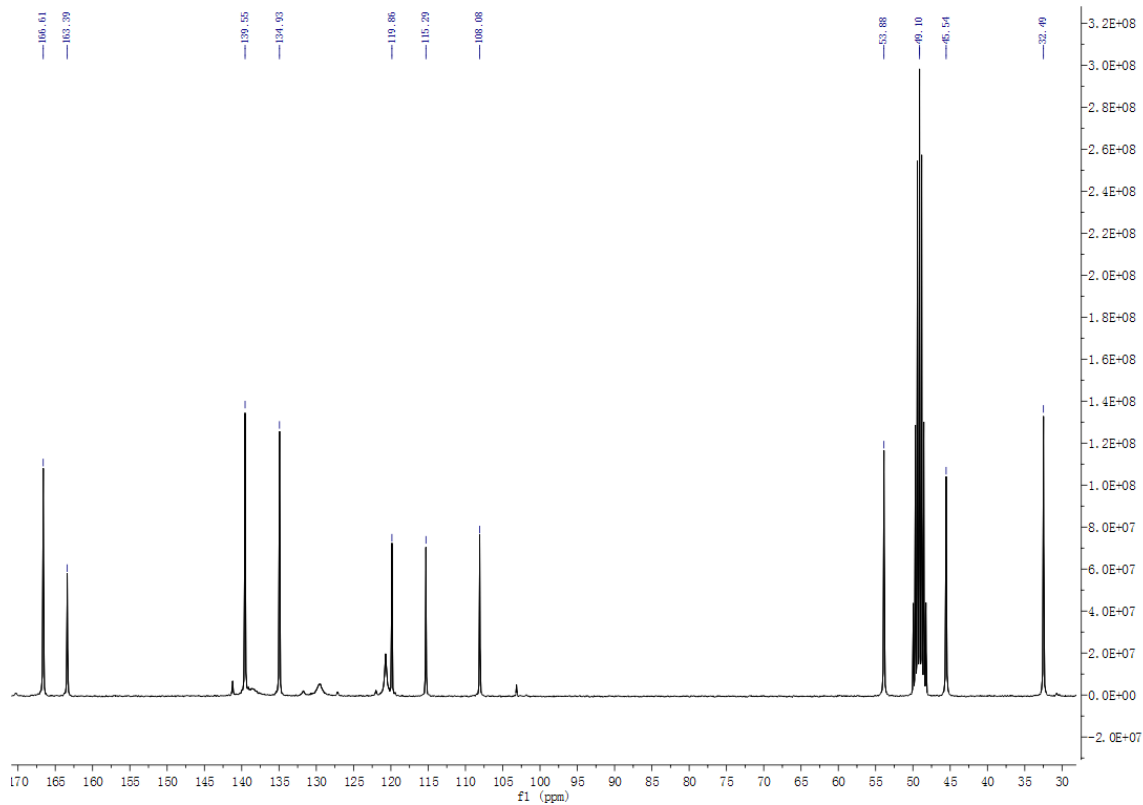

**Fig. SI11**  $^{13}\text{C}$  NMR spectrum of  $\text{HL}_2$ .

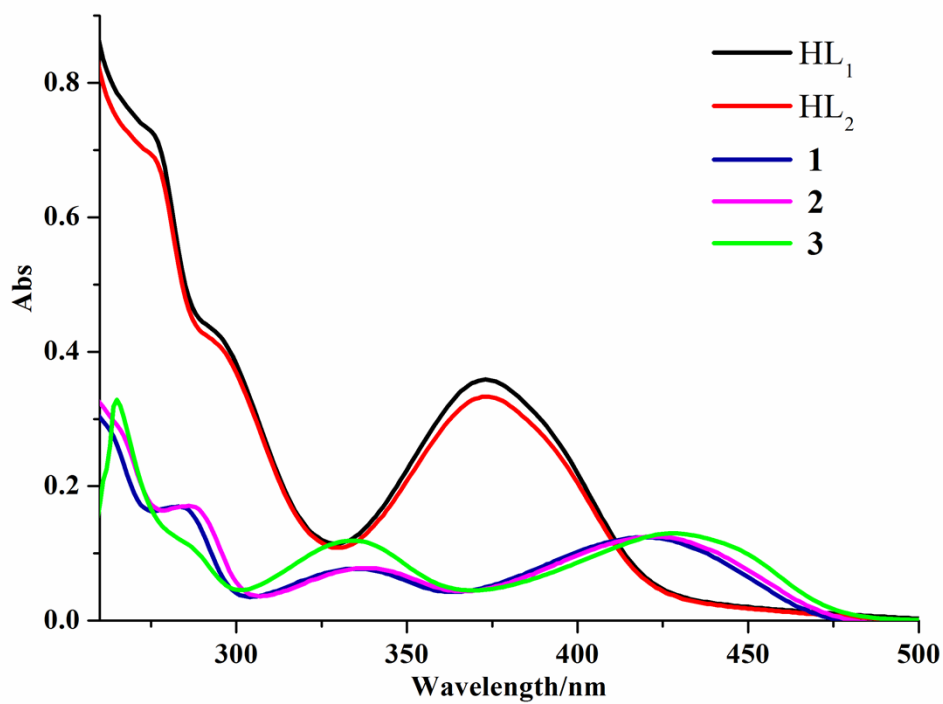

**Fig. SI12** UV-Vis spectral comparisons for  $\text{HL}_1$ ,  $\text{HL}_2$ , complexes **1** and **2** in methanol as well as complex **3** in DMF.



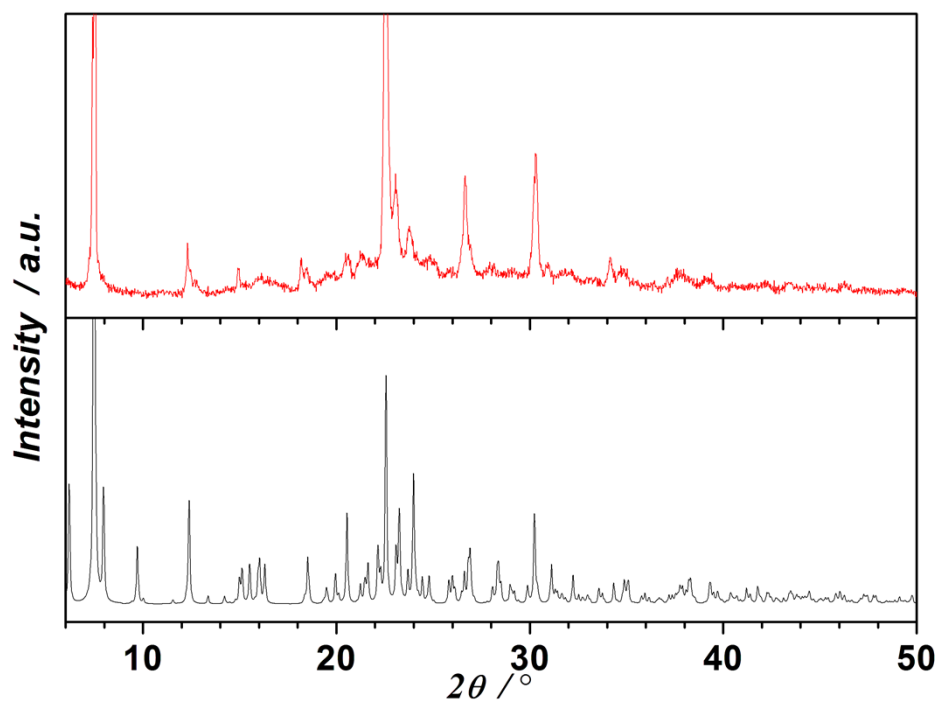

**Fig. SI13** The simulative (black line) and experimental (red line) powder X-ray diffraction patterns for complex 1.

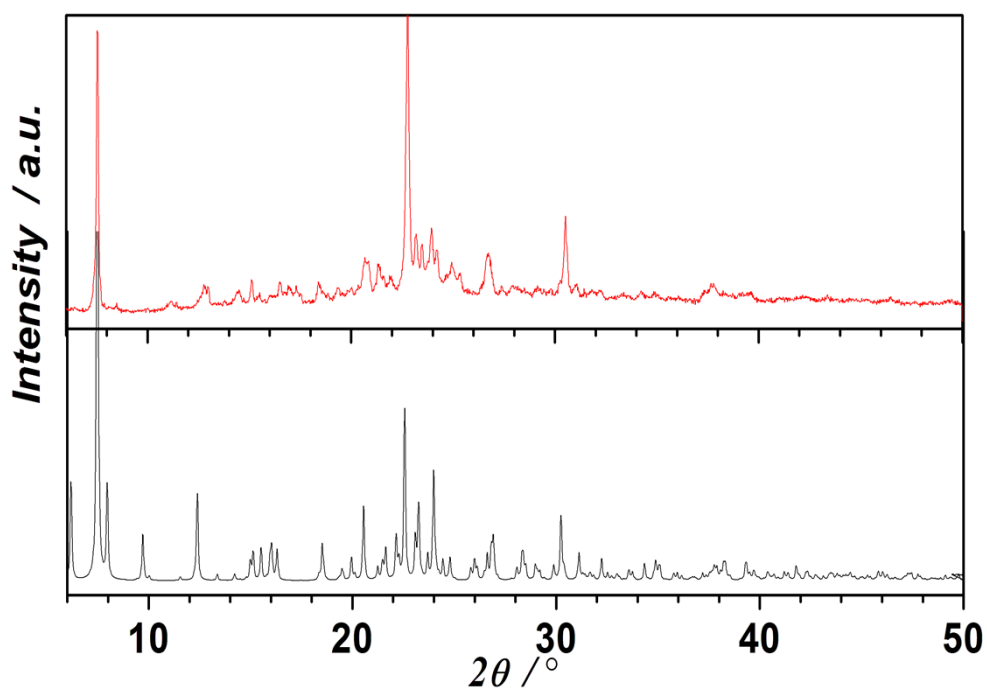

**Fig. SI14** The simulative (black line) and experimental (red line) powder X-ray diffraction patterns for complex 2.

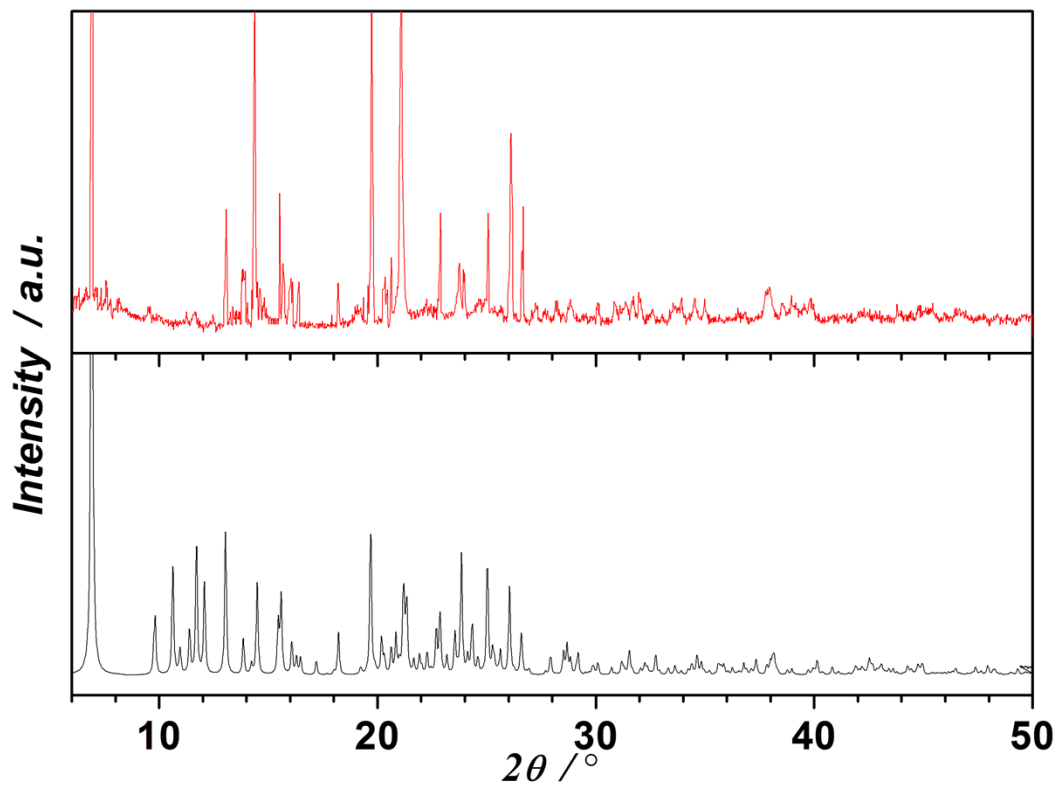

**Fig. SI15** The simulative (black line) and experimental (red line) powder X-ray diffraction patterns for complex **3**.

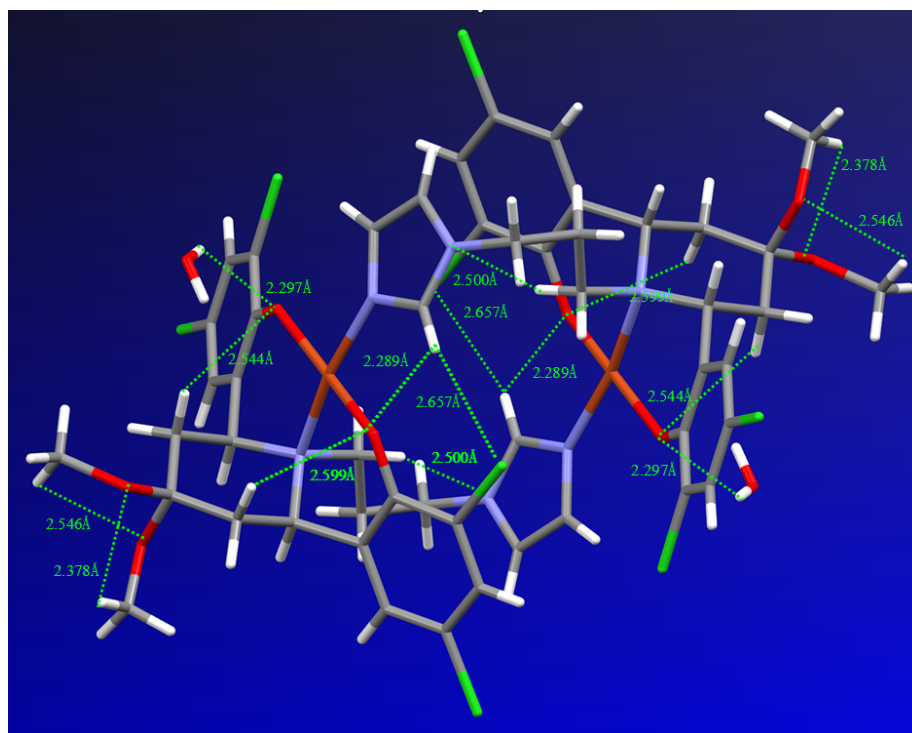

**Fig. SI16** Perspective view of the hydrogen bonding interactions in complex **3**.
